# Supplementary figures and images for: Genetic and Metabolic Determinants of Atrial Fibrillation in a General Population Sample: The CHRIS Study
Source: MDPI journal article supplement (doi:10.3390/biom11111663), 2021-11-09

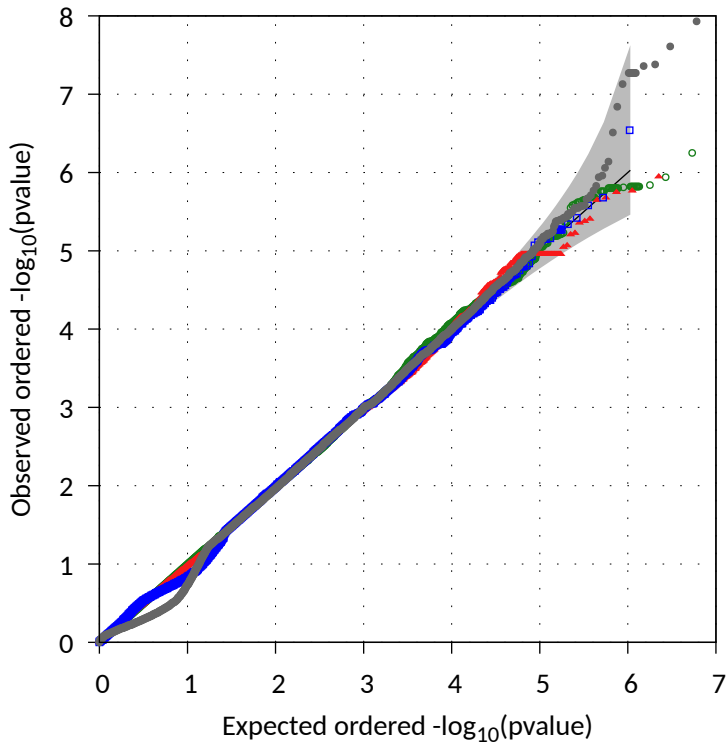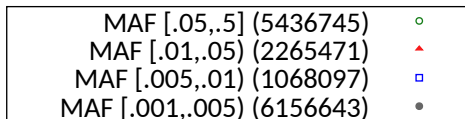

Supplement: s1 [file s1]
